# Supplementary material for: Self-aggregation and coaggregation of the p53 core fragment with its aggregation gatekeeper variant
Source: Royal Society of Chemistry journal article supplement (doi:10.1039/c5cp06538k), 2016-01-01
Supplement: c5cp06538k1.pdf [file c5cp06538k1.pdf]

## Supplementary Materials

### Self-aggregation and coaggregation of p53 core fragment and its aggregation gatekeeper variant

Jiangtao Lei,<sup>a</sup> Ruxi Qi,<sup>a</sup> Guanghong Wei,<sup>a\*</sup> Ruth Nussinov,<sup>b,c</sup> and Buyong Ma<sup>b\*</sup>

<sup>a</sup> State Key Laboratory of Surface Physics, Key Laboratory for Computational Physical Sciences (MOE), and Department of Physics, Fudan University, Shanghai, P. R. China.

<sup>b</sup> Basic Science Program, Leidos Biomedical Research, Inc., Cancer and Inflammation Program, National Cancer Institute, Frederick, Maryland 21702, USA.

<sup>c</sup> Sackler Inst. of Molecular Medicine Department of Human Genetics and Molecular Medicine Sackler School of Medicine, Tel Aviv University, Tel Aviv 69978, Israel.

**This supplementary material contains three figures and 12 tables.**

**Three figures:**

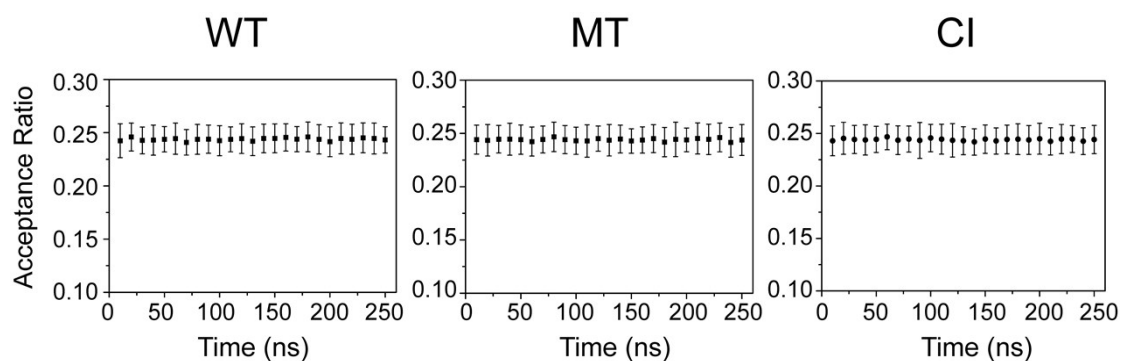

**Fig. S1** Average acceptance ratio of three REMD systems. The acceptance ratio is ~ 24% for the WT, MT and CI systems.

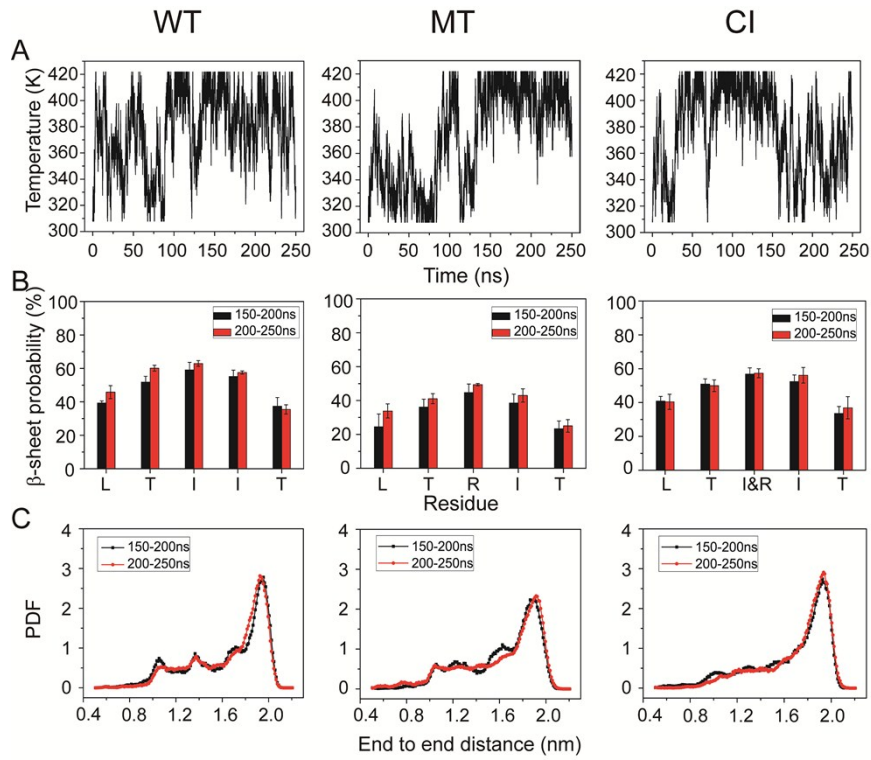

**Fig. S2** Convergence check. The time evolution of a representative 310k replica (A). The  $\beta$ -sheet probability of each residue (B) and the probability density function (PDF) of end-to-end distance of each chain (C) within two different time intervals using the 150-200 ns and 200-250 ns data.

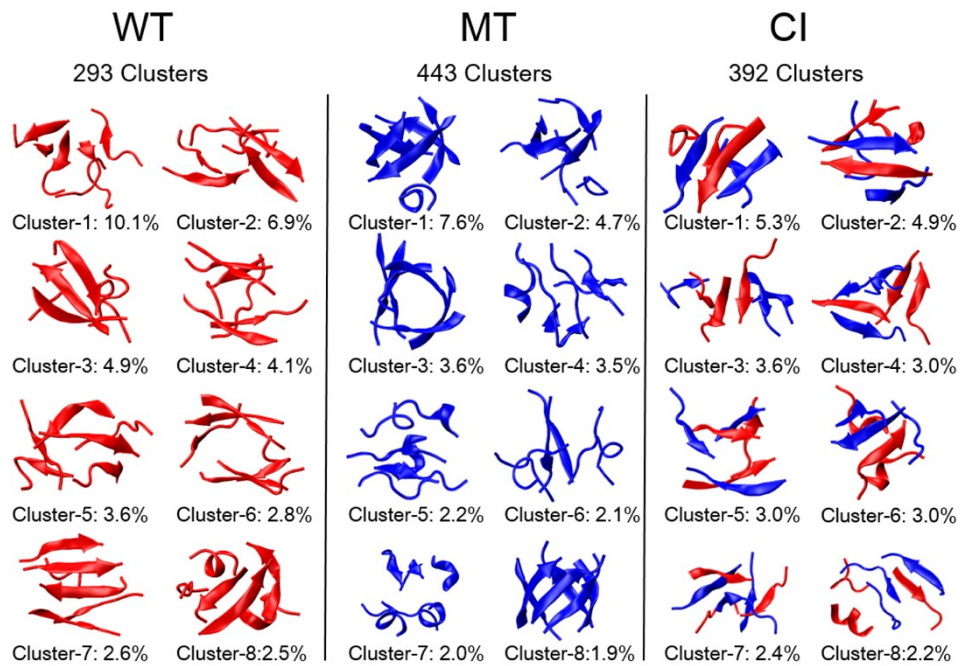

**Fig. S3** Representative conformation of the first eight most-populated clusters. For the

CI hexamer, similar to the WT system, bilayer  $\beta$ -sheets structures, such as those in the first cluster (5.3%) and the fifth cluster (3.0%), are populated.

## 12 Tables:

Table S1. WT Main-chain—main-chain contact probabilities and corresponding errors (Fig. 5A)

|          |                      |                      |                      |                      |                      |                      |                      |
|----------|----------------------|----------------------|----------------------|----------------------|----------------------|----------------------|----------------------|
| L        | 0.060<br>$\pm 0.003$ | 0.061<br>$\pm 0.001$ | 0.060<br>$\pm 0.002$ | 0.065<br>$\pm 0.002$ | 0.047<br>$\pm 0.002$ | 0.048<br>$\pm 0.004$ | 0.046<br>$\pm 0.007$ |
| T        | 0.072<br>$\pm 0.005$ | 0.094<br>$\pm 0.010$ | 0.093<br>$\pm 0.003$ | 0.081<br>$\pm 0.002$ | 0.067<br>$\pm 0.001$ | 0.052<br>$\pm 0.001$ | 0.048<br>$\pm 0.004$ |
| I        | 0.087<br>$\pm 0.005$ | 0.125<br>$\pm 0.017$ | 0.139<br>$\pm 0.003$ | 0.116<br>$\pm 0.004$ | 0.114<br>$\pm 0.006$ | 0.067<br>$\pm 0.001$ | 0.047<br>$\pm 0.002$ |
| I        | 0.087<br>$\pm 0.003$ | 0.096<br>$\pm 0.007$ | 0.133<br>$\pm 0.008$ | 0.127<br>$\pm 0.002$ | 0.116<br>$\pm 0.004$ | 0.081<br>$\pm 0.002$ | 0.065<br>$\pm 0.002$ |
| T        | 0.049<br>$\pm 0.002$ | 0.090<br>$\pm 0.003$ | 0.131<br>$\pm 0.009$ | 0.133<br>$\pm 0.008$ | 0.139<br>$\pm 0.003$ | 0.093<br>$\pm 0.003$ | 0.060<br>$\pm 0.002$ |
| L        | 0.044<br>$\pm 0.001$ | 0.065<br>$\pm 0.001$ | 0.090<br>$\pm 0.003$ | 0.096<br>$\pm 0.007$ | 0.125<br>$\pm 0.017$ | 0.094<br>$\pm 0.010$ | 0.061<br>$\pm 0.001$ |
| I        | 0.042<br>$\pm 0.001$ | 0.044<br>$\pm 0.001$ | 0.049<br>$\pm 0.002$ | 0.087<br>$\pm 0.003$ | 0.087<br>$\pm 0.005$ | 0.072<br>$\pm 0.007$ | 0.060<br>$\pm 0.003$ |
| Residues | I                    | L                    | T                    | I                    | I                    | T                    | L                    |

Table S2. MT Main-chain—main-chain contact probabilities and corresponding errors (Fig. 5B)

|          |                      |                      |                      |                      |                      |                      |                      |
|----------|----------------------|----------------------|----------------------|----------------------|----------------------|----------------------|----------------------|
| L        | 0.038<br>$\pm 0.001$ | 0.054<br>$\pm 0.001$ | 0.061<br>$\pm 0.001$ | 0.060<br>$\pm 0.004$ | 0.047<br>$\pm 0.004$ | 0.039<br>$\pm 0.002$ | 0.030<br>$\pm 0.005$ |
| T        | 0.063<br>$\pm 0.002$ | 0.075<br>$\pm 0.010$ | 0.090<br>$\pm 0.001$ | 0.091<br>$\pm 0.007$ | 0.086<br>$\pm 0.005$ | 0.060<br>$\pm 0.005$ | 0.039<br>$\pm 0.002$ |
| I        | 0.098<br>$\pm 0.001$ | 0.111<br>$\pm 0.003$ | 0.098<br>$\pm 0.003$ | 0.098<br>$\pm 0.009$ | 0.083<br>$\pm 0.014$ | 0.086<br>$\pm 0.05$  | 0.047<br>$\pm 0.004$ |
| R        | 0.111<br>$\pm 0.004$ | 0.101<br>$\pm 0.005$ | 0.110<br>$\pm 0.001$ | 0.105<br>$\pm 0.004$ | 0.098<br>$\pm 0.009$ | 0.091<br>$\pm 0.007$ | 0.060<br>$\pm 0.004$ |
| T        | 0.070<br>$\pm 0.002$ | 0.080<br>$\pm 0.002$ | 0.093<br>$\pm 0.002$ | 0.110<br>$\pm 0.001$ | 0.098<br>$\pm 0.003$ | 0.090<br>$\pm 0.001$ | 0.061<br>$\pm 0.001$ |
| L        | 0.037<br>$\pm 0.003$ | 0.042<br>$\pm 0.007$ | 0.080<br>$\pm 0.002$ | 0.101<br>$\pm 0.005$ | 0.111<br>$\pm 0.003$ | 0.075<br>$\pm 0.010$ | 0.054<br>$\pm 0.001$ |
| I        | 0.028<br>$\pm 0.002$ | 0.037<br>$\pm 0.003$ | 0.070<br>$\pm 0.002$ | 0.111<br>$\pm 0.004$ | 0.098<br>$\pm 0.001$ | 0.063<br>$\pm 0.002$ | 0.038<br>$\pm 0.001$ |
| Residues | I                    | L                    | T                    | R                    | I                    | T                    | L                    |

Table S3. CI Main-chain—main-chain contact probabilities and corresponding errors (Fig. 5C)

|          |                 |                 |                 |                 |                 |                 |                 |
|----------|-----------------|-----------------|-----------------|-----------------|-----------------|-----------------|-----------------|
| L        | 0.055<br>±0.002 | 0.057<br>±0.007 | 0.063<br>±0.001 | 0.062<br>±0.002 | 0.047<br>±0.001 | 0.047<br>±0.002 | 0.044<br>±0.004 |
| T        | 0.062<br>±0.001 | 0.084<br>±0.003 | 0.095<br>±0.006 | 0.088<br>±0.003 | 0.074<br>±0.004 | 0.064<br>±0.005 | 0.047<br>±0.002 |
| I        | 0.079<br>±0.002 | 0.109<br>±0.002 | 0.126<br>±0.006 | 0.108<br>±0.009 | 0.095<br>±0.011 | 0.074<br>±0.004 | 0.047<br>±0.001 |
| I&R      | 0.079<br>±0.001 | 0.099<br>±0.009 | 0.129<br>±0.006 | 0.134<br>±0.014 | 0.108<br>±0.009 | 0.088<br>±0.003 | 0.062<br>±0.002 |
| T        | 0.058<br>±0.001 | 0.085<br>±0.002 | 0.117<br>±0.005 | 0.129<br>±0.006 | 0.126<br>±0.006 | 0.095<br>±0.006 | 0.063<br>±0.001 |
| L        | 0.046<br>±0.005 | 0.064<br>±0.009 | 0.085<br>±0.002 | 0.099<br>±0.009 | 0.109<br>±0.002 | 0.084<br>±0.003 | 0.057<br>±0.007 |
| I        | 0.036<br>±0.009 | 0.046<br>±0.005 | 0.058<br>±0.001 | 0.079<br>±0.001 | 0.079<br>±0.002 | 0.062<br>±0.001 | 0.055<br>±0.002 |
| Residues | I               | L               | T               | I&R             | I               | T               | L               |

Table S4. WT Side-chain—side-chain contact probabilities and corresponding errors (Fig. 5D)

|          |                 |                 |                 |                 |                 |                 |                 |
|----------|-----------------|-----------------|-----------------|-----------------|-----------------|-----------------|-----------------|
| L        | 0.087<br>±0.001 | 0.101<br>±0.005 | 0.087<br>±0.001 | 0.118<br>±0.010 | 0.098<br>±0.017 | 0.067<br>±0.001 | 0.083<br>±0.001 |
| T        | 0.093<br>±0.008 | 0.111<br>±0.003 | 0.096<br>±0.005 | 0.103<br>±0.001 | 0.097<br>±0.008 | 0.082<br>±0.007 | 0.067<br>±0.001 |
| I        | 0.110<br>±0.006 | 0.158<br>±0.009 | 0.135<br>±0.013 | 0.201<br>±0.015 | 0.165<br>±0.018 | 0.097<br>±0.008 | 0.098<br>±0.017 |
| I        | 0.147<br>±0.008 | 0.166<br>±0.013 | 0.149<br>±0.015 | 0.209<br>±0.008 | 0.201<br>±0.015 | 0.103<br>±0.001 | 0.118<br>±0.010 |
| T        | 0.076<br>±0.011 | 0.110<br>±0.011 | 0.118<br>±0.015 | 0.149<br>±0.015 | 0.135<br>±0.013 | 0.096<br>±0.005 | 0.087<br>±0.001 |
| L        | 0.112<br>±0.001 | 0.123<br>±0.001 | 0.110<br>±0.010 | 0.166<br>±0.013 | 0.158<br>±0.009 | 0.111<br>±0.003 | 0.101<br>±0.005 |
| I        | 0.106<br>±0.009 | 0.112<br>±0.009 | 0.076<br>±0.011 | 0.147<br>±0.008 | 0.110<br>±0.006 | 0.093<br>±0.008 | 0.087<br>±0.001 |
| Residues | I               | L               | T               | I               | I               | T               | L               |

Table S5. MT Side-chain—side-chain contact probabilities and corresponding errors (Fig. 5E)

|   |                 |                 |                 |                 |                 |                 |                 |
|---|-----------------|-----------------|-----------------|-----------------|-----------------|-----------------|-----------------|
| L | 0.105<br>±0.014 | 0.097<br>±0.009 | 0.103<br>±0.001 | 0.090<br>±0.002 | 0.133<br>±0.006 | 0.060<br>±0.005 | 0.090<br>±0.003 |
| T | 0.082<br>±0.003 | 0.091<br>±0.013 | 0.102<br>±0.005 | 0.108<br>±0.006 | 0.099<br>±0.001 | 0.092<br>±0.002 | 0.060<br>±0.005 |

|          |                 |                 |                 |                 |                  |                 |                 |
|----------|-----------------|-----------------|-----------------|-----------------|------------------|-----------------|-----------------|
| I        | 0.147<br>±0.002 | 0.183<br>±0.010 | 0.216<br>±0.007 | 0.097<br>±0.002 | 0.322<br>±0.0043 | 0.099<br>±0.001 | 0.133<br>±0.006 |
| R        | 0.126<br>±0.002 | 0.114<br>±0.007 | 0.110<br>±0.001 | 0.077<br>±0.003 | 0.097<br>±0.002  | 0.108<br>±0.006 | 0.090<br>±0.002 |
| T        | 0.064<br>±0.006 | 0.112<br>±0.008 | 0.118<br>±0.005 | 0.110<br>±0.001 | 0.216<br>±0.007  | 0.102<br>±0.005 | 0.103<br>±0.001 |
| L        | 0.087<br>±0.007 | 0.133<br>±0.014 | 0.112<br>±0.008 | 0.114<br>±0.007 | 0.183<br>±0.010  | 0.091<br>±0.013 | 0.097<br>±0.009 |
| I        | 0.086<br>±0.011 | 0.087<br>±0.007 | 0.064<br>±0.006 | 0.126<br>±0.002 | 0.147<br>±0.002  | 0.082<br>±0.003 | 0.105<br>±0.014 |
| Residues | I               | L               | T               | R               | I                | T               | L               |

Table S6. CI Side-chain—side-chain contact probabilities and corresponding errors (Fig. 5F)

|          |                 |                 |                 |                 |                 |                 |                 |
|----------|-----------------|-----------------|-----------------|-----------------|-----------------|-----------------|-----------------|
| L        | 0.102<br>±0.003 | 0.111<br>±0.005 | 0.090<br>±0.001 | 0.119<br>±0.005 | 0.113<br>±0.002 | 0.072<br>±0.001 | 0.098<br>±0.005 |
| T        | 0.081<br>±0.001 | 0.091<br>±0.002 | 0.104<br>±0.001 | 0.096<br>±0.009 | 0.105<br>±0.008 | 0.080<br>±0.004 | 0.072<br>±0.001 |
| I        | 0.114<br>±0.001 | 0.166<br>±0.001 | 0.147<br>±0.007 | 0.182<br>±0.002 | 0.207<br>±0.014 | 0.105<br>±0.008 | 0.113<br>±0.002 |
| I&R      | 0.118<br>±0.004 | 0.129<br>±0.002 | 0.153<br>±0.018 | 0.136<br>±0.012 | 0.182<br>±0.002 | 0.096<br>±0.009 | 0.119<br>±0.005 |
| T        | 0.080<br>±0.004 | 0.105<br>±0.011 | 0.118<br>±0.010 | 0.153<br>±0.018 | 0.147<br>±0.007 | 0.104<br>±0.001 | 0.090<br>±0.001 |
| L        | 0.096<br>±0.003 | 0.114<br>±0.003 | 0.105<br>±0.011 | 0.129<br>±0.002 | 0.166<br>±0.001 | 0.091<br>±0.002 | 0.111<br>±0.005 |
| I        | 0.090<br>±0.009 | 0.096<br>±0.003 | 0.080<br>±0.004 | 0.118<br>±0.004 | 0.114<br>±0.001 | 0.081<br>±0.001 | 0.102<br>±0.003 |
| Residues | I               | L               | T               | I&R             | I               | T               | L               |

Table S7. WT-WT Main-chain—main-chain contact probabilities and corresponding errors in CI system (Fig. 7A)

|     |                 |                 |                 |                 |                 |                 |                 |
|-----|-----------------|-----------------|-----------------|-----------------|-----------------|-----------------|-----------------|
| L   | 0.035<br>±0.002 | 0.034<br>±0.010 | 0.042<br>±0.003 | 0.046<br>±0.001 | 0.027<br>±0.007 | 0.021<br>±0.006 | 0.022<br>±0.002 |
| T   | 0.040<br>±0.001 | 0.074<br>±0.002 | 0.085<br>±0.002 | 0.035<br>±0.007 | 0.032<br>±0.012 | 0.027<br>±0.006 | 0.021<br>±0.006 |
| I   | 0.065<br>±0.006 | 0.102<br>±0.006 | 0.114<br>±0.012 | 0.065<br>±0.007 | 0.039<br>±0.017 | 0.032<br>±0.012 | 0.027<br>±0.007 |
| I&R | 0.073<br>±0.005 | 0.061<br>±0.002 | 0.106<br>±0.008 | 0.076<br>±0.001 | 0.065<br>±0.007 | 0.035<br>±0.007 | 0.046<br>±0.001 |
| T   | 0.056<br>±0.001 | 0.051<br>±0.010 | 0.082<br>±0.003 | 0.106<br>±0.008 | 0.114<br>±0.012 | 0.085<br>±0.002 | 0.042<br>±0.003 |

|          |                 |                 |                 |                 |                 |                 |                 |
|----------|-----------------|-----------------|-----------------|-----------------|-----------------|-----------------|-----------------|
| L        | 0.031<br>±0.001 | 0.027<br>±0.023 | 0.051<br>±0.010 | 0.061<br>±0.002 | 0.102<br>±0.006 | 0.074<br>±0.002 | 0.034<br>±0.010 |
| I        | 0.025<br>±0.005 | 0.031<br>±0.001 | 0.056<br>±0.001 | 0.073<br>±0.005 | 0.065<br>±0.006 | 0.040<br>±0.001 | 0.035<br>±0.002 |
| Residues | I               | L               | T               | I&R             | I               | T               | L               |

Table S8. MT-MT Main-chain—main-chain contact probabilities and corresponding errors in CI system (Fig. 7B)

|          |                 |                 |                 |                 |                 |                 |                 |
|----------|-----------------|-----------------|-----------------|-----------------|-----------------|-----------------|-----------------|
| L        | 0.032<br>±0.013 | 0.019<br>±0.007 | 0.032<br>±0.013 | 0.036<br>±0.007 | 0.031<br>±0.005 | 0.036<br>±0.025 | 0.025<br>±0.008 |
| T        | 0.035<br>±0.007 | 0.047<br>±0.014 | 0.034<br>±0.003 | 0.040<br>±0.010 | 0.046<br>±0.008 | 0.047<br>±0.034 | 0.036<br>±0.025 |
| I        | 0.068<br>±0.007 | 0.084<br>±0.001 | 0.061<br>±0.004 | 0.039<br>±0.013 | 0.046<br>±0.026 | 0.046<br>±0.008 | 0.031<br>±0.005 |
| I&R      | 0.062<br>±0.004 | 0.050<br>±0.001 | 0.071<br>±0.004 | 0.070<br>±0.032 | 0.039<br>±0.013 | 0.040<br>±0.010 | 0.036<br>±0.007 |
| T        | 0.051<br>±0.004 | 0.049<br>±0.015 | 0.074<br>±0.003 | 0.071<br>±0.004 | 0.061<br>±0.004 | 0.034<br>±0.003 | 0.032<br>±0.013 |
| L        | 0.034<br>±0.015 | 0.047<br>±0.016 | 0.049<br>±0.015 | 0.050<br>±0.001 | 0.084<br>±0.001 | 0.047<br>±0.014 | 0.019<br>±0.007 |
| I        | 0.030<br>±0.001 | 0.034<br>±0.015 | 0.051<br>±0.004 | 0.062<br>±0.004 | 0.068<br>±0.007 | 0.035<br>±0.007 | 0.032<br>±0.013 |
| Residues | I               | L               | T               | I&R             | I               | T               | L               |

Table S9. WT-MT Main-chain—main-chain contact probabilities and corresponding errors in CI system (Fig. 7C)

|          |                 |                 |                 |                 |                 |                 |                 |
|----------|-----------------|-----------------|-----------------|-----------------|-----------------|-----------------|-----------------|
| L        | 0.047<br>±0.006 | 0.045<br>±0.001 | 0.035<br>±0.001 | 0.039<br>±0.004 | 0.033<br>±0.003 | 0.039<br>±0.007 | 0.042<br>±0.010 |
| T        | 0.055<br>±0.011 | 0.057<br>±0.003 | 0.075<br>±0.012 | 0.069<br>±0.004 | 0.065<br>±0.004 | 0.053<br>±0.005 | 0.048<br>±0.009 |
| I        | 0.065<br>±0.001 | 0.083<br>±0.011 | 0.084<br>±0.001 | 0.089<br>±0.009 | 0.077<br>±0.005 | 0.051<br>±0.003 | 0.039<br>±0.005 |
| R        | 0.050<br>±0.004 | 0.102<br>±0.021 | 0.129<br>±0.002 | 0.117<br>±0.013 | 0.098<br>±0.007 | 0.085<br>±0.006 | 0.054<br>±0.011 |
| T        | 0.048<br>±0.004 | 0.099<br>±0.005 | 0.119<br>±0.009 | 0.125<br>±0.010 | 0.098<br>±0.007 | 0.091<br>±0.009 | 0.064<br>±0.005 |
| L        | 0.050<br>±0.007 | 0.073<br>±0.011 | 0.084<br>±0.003 | 0.113<br>±0.008 | 0.092<br>±0.002 | 0.066<br>±0.001 | 0.049<br>±0.011 |
| I        | 0.034<br>±0.012 | 0.045<br>±0.018 | 0.066<br>±0.004 | 0.085<br>±0.004 | 0.082<br>±0.003 | 0.057<br>±0.002 | 0.042<br>±0.005 |
| Residues | I               | L               | T               | I               | I               | T               | L               |

Table S10. WT-WT Side-chain—side-chain contact probabilities and corresponding errors in CI system (Fig. 7D)

|          |                 |                 |                 |                 |                 |                 |                 |
|----------|-----------------|-----------------|-----------------|-----------------|-----------------|-----------------|-----------------|
| L        | 0.073<br>±0.007 | 0.108<br>±0.015 | 0.072<br>±0.010 | 0.132<br>±0.014 | 0.093<br>±0.014 | 0.053<br>±0.001 | 0.073<br>±0.024 |
| T        | 0.071<br>±0.009 | 0.110<br>±0.008 | 0.113<br>±0.005 | 0.089<br>±0.017 | 0.093<br>±0.018 | 0.040<br>±0.009 | 0.053<br>±0.001 |
| I        | 0.088<br>±0.012 | 0.165<br>±0.003 | 0.112<br>±0.012 | 0.205<br>±0.022 | 0.133<br>±0.030 | 0.093<br>±0.018 | 0.093<br>±0.014 |
| I        | 0.129<br>±0.017 | 0.147<br>±0.039 | 0.171<br>±0.023 | 0.179<br>±0.020 | 0.205<br>±0.022 | 0.089<br>±0.017 | 0.132<br>±0.014 |
| T        | 0.067<br>±0.003 | 0.108<br>±0.011 | 0.074<br>±0.018 | 0.171<br>±0.023 | 0.112<br>±0.012 | 0.113<br>±0.005 | 0.072<br>±0.010 |
| L        | 0.100<br>±0.014 | 0.079<br>±0.015 | 0.108<br>±0.011 | 0.147<br>±0.039 | 0.165<br>±0.003 | 0.110<br>±0.008 | 0.108<br>±0.015 |
| I        | 0.058<br>±0.002 | 0.100<br>±0.014 | 0.067<br>±0.003 | 0.129<br>±0.017 | 0.088<br>±0.012 | 0.071<br>±0.009 | 0.073<br>±0.007 |
| Residues | I               | L               | T               | I               | I               | T               | L               |

Table S11. MT-MT Side-chain—side-chain contact probabilities and corresponding errors in CI system (Fig. 7E)

|          |                 |                 |                 |                 |                 |                 |                 |
|----------|-----------------|-----------------|-----------------|-----------------|-----------------|-----------------|-----------------|
| L        | 0.091<br>±0.005 | 0.086<br>±0.009 | 0.084<br>±0.020 | 0.080<br>±0.015 | 0.133<br>±0.001 | 0.071<br>±0.023 | 0.083<br>±0.003 |
| T        | 0.061<br>±0.005 | 0.068<br>±0.005 | 0.068<br>±0.006 | 0.053<br>±0.021 | 0.084<br>±0.028 | 0.063<br>±0.031 | 0.071<br>±0.023 |
| I        | 0.115<br>±0.009 | 0.186<br>±0.010 | 0.160<br>±0.028 | 0.099<br>±0.021 | 0.270<br>±0.056 | 0.084<br>±0.028 | 0.133<br>±0.001 |
| I&R      | 0.109<br>±0.009 | 0.080<br>±0.004 | 0.097<br>±0.020 | 0.084<br>±0.028 | 0.099<br>±0.021 | 0.053<br>±0.021 | 0.080<br>±0.015 |
| T        | 0.062<br>±0.001 | 0.107<br>±0.018 | 0.089<br>±0.026 | 0.097<br>±0.020 | 0.160<br>±0.028 | 0.068<br>±0.006 | 0.084<br>±0.020 |
| L        | 0.084<br>±0.005 | 0.090<br>±0.015 | 0.107<br>±0.018 | 0.080<br>±0.004 | 0.186<br>±0.010 | 0.068<br>±0.005 | 0.086<br>±0.009 |
| I        | 0.085<br>±0.016 | 0.084<br>±0.005 | 0.062<br>±0.001 | 0.109<br>±0.009 | 0.115<br>±0.009 | 0.061<br>±0.005 | 0.091<br>±0.005 |
| Residues | I               | L               | T               | I&R             | I               | T               | L               |

Table S12. WT-MT Side-chain—side-chain contact probabilities and corresponding errors in CI system (Fig. 7F)

|   |                 |                 |                 |                 |                 |                 |                 |
|---|-----------------|-----------------|-----------------|-----------------|-----------------|-----------------|-----------------|
| L | 0.138<br>±0.012 | 0.147<br>±0.003 | 0.084<br>±0.003 | 0.146<br>±0.006 | 0.093<br>±0.001 | 0.094<br>±0.003 | 0.111<br>±0.016 |
| T | 0.082<br>±0.012 | 0.070<br>±0.002 | 0.098<br>±0.002 | 0.112<br>±0.002 | 0.104<br>±0.010 | 0.09<br>±0.007  | 0.065<br>±0.012 |

|          |                 |                 |                 |                 |                 |                 |                 |
|----------|-----------------|-----------------|-----------------|-----------------|-----------------|-----------------|-----------------|
| I        | 0.128<br>±0.013 | 0.162<br>±0.008 | 0.144<br>±0.007 | 0.266<br>±0.013 | 0.211<br>±0.006 | 0.130<br>±0.004 | 0.134<br>±0.001 |
| I&R      | 0.106<br>±0.013 | 0.113<br>±0.007 | 0.135<br>±0.013 | 0.140<br>±0.005 | 0.139<br>±0.005 | 0.113<br>±0.002 | 0.118<br>±0.003 |
| T        | 0.074<br>±0.001 | 0.107<br>±0.012 | 0.142<br>±0.002 | 0.195<br>±0.017 | 0.165<br>±0.011 | 0.135<br>±0.003 | 0.119<br>±0.014 |
| L        | 0.094<br>±0.014 | 0.134<br>±0.015 | 0.101<br>±0.004 | 0.165<br>±0.016 | 0.152<br>±0.011 | 0.116<br>±0.005 | 0.103<br>±0.007 |
| I        | 0.103<br>±0.011 | 0.105<br>±0.002 | 0.107<br>±0.012 | 0.128<br>±0.009 | 0.125<br>±0.013 | 0.110<br>±0.006 | 0.104<br>±0.003 |
| Residues | I               | L               | T               | I&R             | I               | T               | L               |
